# Supplementary material for: Green Extraction-Assisted Pseudo-Targeted Profile of Alkaloids in Lotus Seed Epicarp Based on UPLC-QTOF MS with IDA
Source: MDPI journal article supplement (doi:10.3390/foods11071056), 2022-04-06
Supplement: s1 [file s1]

## Supplementary Materials

### Green extraction assisted pseudo-targeted profile of alkaloids in lotus seed epicarp based on UPLC-QTOF MS with IDA

Xiaoji Cao<sup>1,2\*</sup>, Xupin Lin<sup>2</sup>, Congcong Wu<sup>2</sup>, Minghua Zhang<sup>2</sup>, Mingwei Wang<sup>2</sup>

<sup>1</sup> Research Center of Analysis and Measurement, Zhejiang University of Technology, Hangzhou 310014, Zhejiang, China; xiaojicao@zjut.edu.cn

<sup>2</sup> College of Chemical Engineering, Zhejiang University of Technology, Hangzhou 310014, Zhejiang, China; xupinl@163.com (X.L.); 807047075@qq.com (C.W.); 719838005@qq.com (M.Z.); 1002296149@qq.com (M.W.)

\* Corresponding: xiaojicao@zjut.edu.cn (X.C.); Tel.: +86-0572-8813458 (X.C.)

#### S1 Single-factor experiments

When the ethyl lactate concentration (10, 30, 50, 70, 90, and 100% (v/v)) was selected as the control factor, other conditions were solid-to-liquid ratio of 1:20 g/mL, ultrasonic time of 10 min, ultrasonic temperature of 50 °C and ultrasonic power of 70 W. When the solid-to-liquid ration (1:5, 1:10, 1:15, 1:20, 1:25 and 1:30 g/mL) was used as the control factor, other conditions were ethyl lactate concentration of 50%, ultrasonic time of 10 min, ultrasonic temperature of 50 °C and ultrasonic power of 70 W. When the ultrasonic time (5, 10, 15, 20, 25 and 30 min) was used as the control factor, other conditions were ethyl lactate concentration of 50%, solid-to-liquid ratio of 1:20 g/mL, ultrasonic temperature of 50 °C and ultrasonic power of 70 W. When the ultrasonic temperature (30, 40, 50, 60 and 70 °C) was used as the control factor, other conditions were ethyl lactate concentration of 50%, solid-to-liquid ratio of 1:20 g/mL, ultrasonic time of 10 min and ultrasonic power of 70 W. When the ultrasonic power (50, 60, 70, 80, 90 and 100 W) was used as the control factor, other conditions were ethyl lactate concentration of 50%, solid-to-liquid ratio of 1:20 g/mL, ultrasonic time of 10 min, temperature of 50 °C.

## S2 Establishment of the standard curve of nuciferine

A stock solution of nuciferine standard was prepared with methanol at a concentration of 0.1 mg/mL and stored at 4 °C. Working standard solutions were prepared covering a concentration range from 1 to 200 µg/L (1, 10, 50, 100, 150, 200 µg/L) for UPLC-MS/MS analysis. By external standard method, the standard curve was drawn with the vertical coordinate of the peak area intensity of nuciferine and the horizontal coordinate of the concentration. The standard curve equation of nuciferine was obtained as  $y=4193.67351x+336.02980$  ( $R^2=0.999$ ).

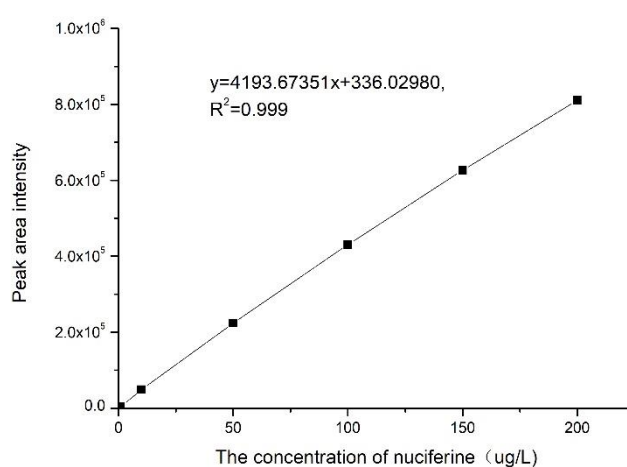

Figure S1. The standard curve of nuciferine

### **S3 Conventional reference extraction methods**

#### **(1) ultrasonic-assisted extraction with ethanol**

1.0 g lotus seed epicarp powder and 25 mL ethanol aqueous solution (90%, v/v) were displaced in a 50 ml glass vial and extracted under ultrasound for 30 min, where the ultrasonic temperature was 50 °C and the ultrasonic power was 60 W.

#### **(2) ultrasonic-assisted extraction with methanol**

0.5 g lotus seed epicarp powder and 25 mL methanol aqueous solution (70%, v/v) were displaced in a 50 ml glass vial and extracted under ultrasound for 30 min, where the ultrasonic temperature was 50 °C and the ultrasonic power was 60 W.

#### **(3) reflux with ethanol**

1.0 g lotus seed epicarp powder and 10 mL ethanol aqueous solution (70%, v/v) were displaced in a 50 ml flask and boiled at 90 °C for 60 min under the oil-bath reflux (201D, Huichuang, Hangzhou, China).

#### **(4) reflux with methanol**

1.0 g lotus seed epicarp powder and 10 mL methanol aqueous solution (50%, v/v) were displaced in a 50 ml flask and extracted at 25 °C for 60 min under the oil-bath reflux (201D, Huichuang, Hangzhou, China).

**Table S1.** Factors and levels of variables for the **Box-Behnken design**.

| Factors                             | Levels |      |      |
|-------------------------------------|--------|------|------|
|                                     | -1     | 0    | 1    |
| ethyl lactate concentration (%) - A | 30     | 50   | 70   |
| solid-to-liquid (g/mL) - B          | 1:10   | 1:15 | 1:20 |
| ultrasonic time (min) - C           | 5      | 10   | 15   |

**Table S2.** The MRM<sup>HR</sup> experiments parameters of 10 target alkaloids

| Compounds name                           | Precursor ion<br>(Da) | Fragment ion<br>(Da) | Declustering<br>potential(V) | Collision<br>energy(V) |
|------------------------------------------|-----------------------|----------------------|------------------------------|------------------------|
| nicotinamide                             | 123.05                | 80.0514              | 80                           | 33                     |
| <i>N</i> -nornuciferine                  | 282.14                | 265.1235             | 80                           | 20                     |
| coclaurine                               | 286.14                | 107.0491             | 80                           | 31                     |
| <i>N</i> -methycoclaurine                | 300.16                | 107.0491             | 80                           | 33                     |
| nuciferine                               | 296.16                | 265.1210             | 80                           | 27                     |
| asimilobine                              | 268.13                | 251.1074             | 80                           | 22                     |
| isoliensinine                            | 611.31                | 192.1008             | 80                           | 40                     |
| neferine                                 | 625.33                | 206.1158             | 80                           | 40                     |
| cis - <i>N</i> -<br>feruloyltyramine     | 314.13                | 145.0290             | 80                           | 35                     |
| cis/tran- <i>N</i> -<br>feruloyltyramine | 314.13                | 145.0290             | 80                           | 35                     |

**Table S3.** The result of 17 experimental groups for RSM

| Run | A  | B  | C  | Total alkaloids content<br>(mg nuciferine/g) |
|-----|----|----|----|----------------------------------------------|
| 1   | -1 | -1 | 0  | 26.02                                        |
| 2   | 1  | -1 | 0  | 32.20                                        |
| 3   | -1 | 1  | 0  | 28.45                                        |
| 4   | 1  | 1  | 0  | 31.47                                        |
| 5   | -1 | 0  | -1 | 27.72                                        |
| 6   | 1  | 0  | -1 | 31.42                                        |
| 7   | -1 | 0  | 1  | 26.31                                        |
| 8   | 1  | 0  | 1  | 33.45                                        |
| 9   | 0  | -1 | -1 | 33.63                                        |
| 10  | 0  | 1  | -1 | 34.72                                        |
| 11  | 0  | -1 | 1  | 33.55                                        |
| 12  | 0  | 1  | 1  | 34.09                                        |
| 13  | 0  | 0  | 0  | 33.29                                        |
| 14  | 0  | 0  | 0  | 33.22                                        |
| 15  | 0  | 0  | 0  | 32.36                                        |
| 16  | 0  | 0  | 0  | 32.65                                        |
| 17  | 0  | 0  | 0  | 32.37                                        |

**Table S4.** Analysis of variance (ANOVA) for quadratic model

| Source             | Sum of Squares | df | Mean square | F-Value  | p-Value  |                 |
|--------------------|----------------|----|-------------|----------|----------|-----------------|
| Model              | 118.20         | 9  | 13.13       | 67.27    | < 0.0001 | Significant     |
| A                  | 50.23          | 1  | 50.23       | 257.27   | < 0.0001 |                 |
| B                  | 1.40           | 1  | 1.40        | 7.15     | 0.0318   |                 |
| C                  | 0.001246       | 1  | 0.001246    | 0.006381 | 0.9386   |                 |
| AB                 | 2.51           | 1  | 2.51        | 12.84    | 0.0089   |                 |
| AC                 | 2.96           | 1  | 2.96        | 15.16    | 0.0059   |                 |
| BC                 | 0.078          | 1  | 0.078       | 0.40     | 0.5465   |                 |
| A <sup>2</sup>     | 59.45          | 1  | 59.45       | 304.49   | < 0.0001 |                 |
| B <sup>2</sup>     | 1.11           | 1  | 1.11        | 5.69     | 0.0485   |                 |
| C <sup>2</sup>     | 2.08           | 1  | 2.08        | 10.67    | 0.0138   |                 |
| Error              | 1.37           | 7  | 0.20        |          |          | not significant |
| Lack of Fit        | 0.55           | 3  | 0.18        | 0.91     | 0.5130   |                 |
| Pure Error         | 0.81           | 4  |             |          |          |                 |
| Cor Total          | 119.57         | 16 |             |          |          |                 |
| R <sup>2</sup>     | 0.9866         |    |             |          |          |                 |
| Adj R <sup>2</sup> | 0.9739         |    |             |          |          |                 |

**Table S5.** Characterization of alkaloids in lotus seed epicarp by UPLC-QTOF-MS/MS in positive mode

| NO. | tr<br>(min) | [M+H] <sup>+</sup><br>measured | M        | Molecular<br>formula                            | MS <sup>2</sup> fragment ion (m/z)               | Identification                       |
|-----|-------------|--------------------------------|----------|-------------------------------------------------|--------------------------------------------------|--------------------------------------|
| 1   | 0.78        | 123.0552                       | 122.0475 | C <sub>6</sub> H <sub>6</sub> N <sub>2</sub> O  | 106.0286, 96.0443, 80.0514, 78.0360              | Nicotinamide                         |
| 2   | 0.90        | 434.1809                       | 433.1736 | C <sub>22</sub> H <sub>27</sub> NO <sub>8</sub> | 272.1268, 255.1009, 161.0578, 143.0473, 107.0475 | norcoclaurine-4'-O-glucoside         |
| 3   | 0.95        | 448.1965                       | 447.1887 | C <sub>23</sub> H <sub>29</sub> NO <sub>8</sub> | 286.1439, 255.1018, 161.0596, 107.0491           | N-methylnorcoclaurine 7-O-glucoside  |
| 4   | 1.12        | 448.1965                       | 447.1887 | C <sub>23</sub> H <sub>29</sub> NO <sub>8</sub> | 286.1439, 255.1018, 161.0596, 107.0491           | N-methylnorcoclaurine 4'-O-glucoside |
| 5   | 1.25        | 462.2122                       | 461.2044 | C <sub>24</sub> H <sub>31</sub> NO <sub>8</sub> | 300.1600, 269.1178, 257.1180, 107.0487           | N-methylcoclaurine 7-O-glucoside     |
| 6   | 1.33        | 448.1965                       | 447.1887 | C <sub>23</sub> H <sub>29</sub> NO <sub>8</sub> | 286.1438, 269.1173, 237.0905, 209.0952, 107.0497 | coclaurine 7-O-glucoside             |
| 7   | 1.55        | 448.1965                       | 447.1887 | C <sub>23</sub> H <sub>29</sub> NO <sub>8</sub> | 286.1438, 269.1173, 237.0905, 209.0952, 107.0497 | isococlaurine 4'-O-glucoside         |
| 8   | 1.56        | 462.2122                       | 461.2044 | C <sub>24</sub> H <sub>31</sub> NO <sub>8</sub> | 300.1600, 269.1178, 257.1180, 107.0487           | N-methylcoclaurine 4'-O-glucoside    |
| 9   | 1.67        | 298.1438                       | 297.1360 | C <sub>18</sub> H <sub>19</sub> NO <sub>3</sub> | 255.1033, 237.0899, 223.0740, 195.0788           | glaziovine                           |
| 10  | 1.77        | 272.1282                       | 271.1208 | C <sub>16</sub> H <sub>17</sub> NO <sub>3</sub> | 255.1016, 161.0507, 143.0411, 123.0377, 107.0491 | norcoclaurine                        |
| 11  | 1.86        | 286.1438                       | 285.1360 | C <sub>17</sub> H <sub>19</sub> NO <sub>3</sub> | 255.1019, 209.0948, 161.0593, 143.0487, 107.0486 | N-methylnorcoclaurine                |
| 12  | 2.01        | 476.2278                       |          | C <sub>25</sub> H <sub>33</sub> NO <sub>8</sub> | 314.1755, 283.1336, 107.0496                     | lotusine 7-O-glucoside               |
| 13  | 2.56        | 314.1751                       |          | C <sub>19</sub> H <sub>23</sub> NO <sub>3</sub> | 269.1172, 237.0910, 107.0484                     | lotusine                             |
| 14  | 2.71        | 476.2278                       |          | C <sub>25</sub> H <sub>33</sub> NO <sub>8</sub> | 314.1755, 283.1336, 107.0496                     | lotusine 4'-O-glucoside              |

|    |      |          |          |                                                               |                                                            |                                                  |
|----|------|----------|----------|---------------------------------------------------------------|------------------------------------------------------------|--------------------------------------------------|
| 15 | 3.66 | 300.1594 | 299.1521 | C <sub>18</sub> H <sub>21</sub> NO <sub>3</sub>               | 269.1165, 237.0911, 209.0951, 175.0745, 143.0488, 107.0496 | <i>N</i> -methylisococlaurine                    |
| 16 | 4.05 | 286.1438 | 285.1360 | C <sub>17</sub> H <sub>19</sub> NO <sub>3</sub>               | 269.1173, 237.0905, 209.0952, 175.0750, 143.0487, 107.0497 | coclaurine                                       |
| 17 | 4.29 | 300.1594 | 299.1521 | C <sub>18</sub> H <sub>21</sub> NO <sub>3</sub>               | 269.1165, 237.0911, 209.0951, 175.0745, 143.0488, 107.0496 | <i>N</i> -methylcoclaurine                       |
| 18 | 4.53 | 312.1594 | 311.1516 | C <sub>19</sub> H <sub>21</sub> NO <sub>3</sub>               | 283.1326, 269.1164, 254.0937, 238.0991, 223.0740, 195.0788 | pronuciferine                                    |
| 19 | 5.12 | 314.1751 | 313.1673 | C <sub>19</sub> H <sub>23</sub> NO <sub>3</sub>               | 283.1330, 268.1096, 252.1147, 237.0909, 151.0754, 107.0491 | armepavine                                       |
| 20 | 5.16 | 300.1594 | 299.1516 | C <sub>18</sub> H <sub>21</sub> NO <sub>3</sub>               | 283.1343, 268.1097, 237.0907, 189.0807, 107.0495           | <i>N</i> -norarmepavine                          |
| 21 | 5.17 | 611.3120 | 610.3043 | C <sub>37</sub> H <sub>42</sub> N <sub>2</sub> O <sub>6</sub> | 580.2686, 568.2684, 475.2215, 192.1008, 121.0636           | isoliensinine                                    |
| 22 | 5.30 | 286.1438 | 285.1360 | C <sub>17</sub> H <sub>19</sub> NO <sub>3</sub>               | 269.1173, 237.0905, 209.0952, 175.0750, 143.0487, 107.0497 | isococlaurine                                    |
| 23 | 5.31 | 300.1594 | 299.1521 | C <sub>18</sub> H <sub>21</sub> NO <sub>3</sub>               | 269.1165, 237.0911, 209.0951, 175.0745, 143.0488, 107.0496 | 6-demethyl-4'-methyl- <i>N</i> -methylcoclaurine |
| 24 | 5.37 | 268.1332 | 267.1254 | C <sub>17</sub> H <sub>17</sub> NO <sub>2</sub>               | 251.1074, 236.0840, 219.0809, 191.0856                     | asimilobine                                      |
| 25 | 5.38 | 625.3272 | 624.3199 | C <sub>38</sub> H <sub>44</sub> N <sub>2</sub> O <sub>6</sub> | 594.2864, 503.2546, 489.2392, 206.1181                     | neferine                                         |
| 26 | 5.48 | 282.1489 | 281.1411 | C <sub>18</sub> H <sub>19</sub> NO <sub>2</sub>               | 251.1066, 236.0838, 219.0800, 191.0853                     | <i>O</i> -nornuciferine                          |
| 27 | 5.49 | 312.1594 | 311.1516 | C <sub>19</sub> H <sub>21</sub> NO <sub>3</sub>               | 281.1158, 266.0926, 250.0976, 235.0692                     | oxidation-nuciferine                             |
| 28 | 5.51 | 314.1751 | 313.1673 | C <sub>19</sub> H <sub>23</sub> NO <sub>3</sub>               | 283.1322, 251.1065, 175.0772, 121.0651                     | 4'-methyl- <i>N</i> -methylcoclaurine            |
| 29 | 5.61 | 268.1332 | 267.1254 | C <sub>17</sub> H <sub>17</sub> NO <sub>2</sub>               | 251.1074, 236.0840, 219.0809, 201.0694, 191.0856           | caaverine                                        |
| 30 | 5.64 | 298.1438 | 297.1360 | C <sub>18</sub> H <sub>19</sub> NO <sub>3</sub>               | 251.1074, 236.0840, 219.0809, 191.0856                     | <i>N</i> -methyl asimilobine- <i>N</i> -oxide    |
| 31 | 5.69 | 282.1489 | 281.1411 | C <sub>18</sub> H <sub>19</sub> NO <sub>2</sub>               | 251.1066, 236.0838, 219.0800, 201.0698, 191.0853, 165.0694 | lirinidine                                       |



|    |      |          |          |                                                 |                                                            |                                                         |
|----|------|----------|----------|-------------------------------------------------|------------------------------------------------------------|---------------------------------------------------------|
| 32 | 5.98 | 266.1175 | 265.1103 | C <sub>17</sub> H <sub>15</sub> NO <sub>2</sub> | 249.0910, 219.0804, 191.0855                               | anonaine                                                |
| 33 | 6.00 | 282.1489 | 281.1411 | C <sub>18</sub> H <sub>19</sub> NO <sub>2</sub> | 265.1219, 250.0980, 235.0747, 207.0814, 191.0853, 165.0694 | <i>N</i> -nornuciferine                                 |
| 34 | 6.03 | 280.1332 | 279.1254 | C <sub>18</sub> H <sub>17</sub> NO <sub>2</sub> | 249.0911, 219.0801, 201.0605, 191.0854, 178.0770, 165.0697 | roemerine                                               |
| 35 | 6.05 | 296.1645 | 295.1567 | C <sub>19</sub> H <sub>21</sub> NO <sub>2</sub> | 265.1210, 250.0977, 235.0750, 219.0799, 191.0741, 165.0696 | nuciferine                                              |
| 36 | 6.06 | 314.1387 | 313.1314 | C <sub>18</sub> H <sub>19</sub> NO <sub>4</sub> | 177.0549, 145.0285, 121.0651, 103.0543                     | <i>cis-N</i> -feruloyltyramine                          |
| 37 | 6.19 | 312.1594 | 311.1516 | C <sub>19</sub> H <sub>21</sub> NO <sub>3</sub> | 265.1216, 250.0987, 235.0751, 219.0663, 191.0741           | nuciferine- <i>N</i> -methanol                          |
| 38 | 6.18 | 314.1387 | 313.1314 | C <sub>18</sub> H <sub>19</sub> NO <sub>4</sub> | 177.0549, 145.0285, 121.0651, 103.0543                     | <i>trans-N</i> -feruloyltyramine                        |
| 39 | 6.70 | 268.1332 | 267.1254 | C <sub>17</sub> H <sub>17</sub> NO <sub>2</sub> | 131.0494, 121.0653, 103.0548                               | <i>cis/trans</i> isomers of <i>N</i> -cinnamoyltyramine |
| 40 | 6.91 | 268.1332 | 267.1254 | C <sub>17</sub> H <sub>17</sub> NO <sub>2</sub> | 131.0494, 121.0653, 103.0548                               | <i>cis/trans</i> isomers of <i>N</i> -cinnamoyltyramine |
| 41 | 7.87 | 324.1594 | 323.1516 | C <sub>20</sub> H <sub>21</sub> NO <sub>3</sub> | 265.1228, 250.1053, 233.0961, 218.0728                     | nuciferine- <i>N</i> -acetyl                            |
| 42 | 7.97 | 308.1281 | 307.1203 | C <sub>19</sub> H <sub>17</sub> NO <sub>3</sub> | 249.0906, 219.0802, 191.0850, 178.0772, 165.0690           | anonaine - <i>N</i> -acetyl                             |

**Table S6.** Method validation of the ten alkaloids in lotus seed epicarp

| Alkaloids                         | Liner<br>range<br>( $\mu\text{g/L}$ ) | Calibration curve         | $R^2$ | LOD<br>( $\mu\text{g/L}$ ) | LOQ<br>( $\mu\text{g/L}$ ) | RSD (%) (n=5) |           |
|-----------------------------------|---------------------------------------|---------------------------|-------|----------------------------|----------------------------|---------------|-----------|
|                                   |                                       |                           |       |                            |                            | Intra-day     | Inter-day |
| nicotinamide                      | 5-200                                 | $y=194.52378x-10.79699$   | 0.999 | 0.52                       | 2.57                       | 1.95          | 2.66      |
| <i>N</i> -nornuciferine           | 1-200                                 | $y=2108.24132x+255.27772$ | 0.999 | 0.10                       | 0.30                       | 0.68          | 4.15      |
| coclaurine                        | 1-200                                 | $y=1075.04641x+374.17352$ | 0.998 | 0.12                       | 0.60                       | 1.64          | 2.00      |
| <i>N</i> -methycoclaurine         | 1-200                                 | $y=971.13868x+329.84089$  | 0.996 | 0.14                       | 0.70                       | 0.68          | 1.61      |
| nuciferine                        | 1-200                                 | $y=4193.67351x+336.02980$ | 0.998 | 0.10                       | 0.35                       | 2.91          | 4.40      |
| asimilobine                       | 1-200                                 | $y=908.27870x+29.76412$   | 0.999 | 0.26                       | 0.65                       | 1.93          | 2.07      |
| isoliensinine                     | 5-200                                 | $y=213.92071x+0.50564$    | 0.999 | 1.00                       | 3.00                       | 4.79          | 5.26      |
| neferine                          | 1-200                                 | $y=1152.56857x+282.30732$ | 0.998 | 0.36                       | 1.00                       | 2.62          | 4.02      |
| cis- <i>N</i> -feruloyltyramine   | 1-200                                 | $y=327.46671x+96.65130$   | 0.999 | 0.12                       | 0.60                       | 2.38          | 3.06      |
| trans- <i>N</i> -feruloyltyramine | 1-200                                 | $y=109.13443x+1.25007$    | 0.999 | 0.25                       | 0.50                       | 0.97          | 2.74      |

**Table S7.** Recovery yields of the ten alkaloids in lotus seed epicarp

| Alkaloids                        | Add<br>(ng/mL) | Recovery<br>(%) | RSD<br>(%) |
|----------------------------------|----------------|-----------------|------------|
| nicotinamide                     | 5              | 93.71           | 5.33       |
|                                  | 50             | 101.46          | 4.62       |
|                                  | 100            | 101.43          | 4.34       |
| <i>N</i> -nornuciferine          | 5              | 95.57           | 0.82       |
|                                  | 50             | 90.13           | 0.80       |
|                                  | 100            | 92.20           | 1.82       |
| coclaurine                       | 5              | 101.03          | 3.19       |
|                                  | 50             | 102.03          | 2.65       |
|                                  | 100            | 97.46           | 1.66       |
| <i>N</i> -methycoclaurine        | 5              | 99.74           | 4.47       |
|                                  | 50             | 99.52           | 3.40       |
|                                  | 100            | 99.63           | 2.09       |
| nuciferine                       | 5              | 86.33           | 4.67       |
|                                  | 50             | 89.83           | 3.85       |
|                                  | 100            | 90.92           | 2.54       |
| asimilobine                      | 5              | 89.26           | 1.17       |
|                                  | 50             | 90.97           | 1.56       |
|                                  | 199            | 89.17           | 1.18       |
| isoliensinine                    | 5              | 93.20           | 7.38       |
|                                  | 50             | 91.96           | 8.08       |
|                                  | 100            | 96.44           | 5.94       |
| neferine                         | 5              | 93.63           | 3.43       |
|                                  | 50             | 99.98           | 7.80       |
|                                  | 100            | 87.87           | 4.88       |
| <i>cis-N</i> -feruloyltyramine   | 5              | 81.09           | 4.78       |
|                                  | 50             | 82.84           | 2.22       |
|                                  | 100            | 89.13           | 2.47       |
| <i>trans-N</i> -feruloyltyramine | 5              | 92.58           | 7.64       |
|                                  | 50             | 85.25           | 5.75       |
|                                  | 100            | 86.22           | 8.75       |

**Table S8.** Contents of ten alkaloids in lotus seed epicarp at different growth stages

| Stages\( $\mu\text{g/g}$ )        | I                   | II                  | III                  | IV                  | V                   |
|-----------------------------------|---------------------|---------------------|----------------------|---------------------|---------------------|
| nicotinamide                      | 1121.60 $\pm$ 5.80  | 472.87 $\pm$ 2.97   | 302.27 $\pm$ 1.70    | 443.80 $\pm$ 3.80   | 341.07 $\pm$ 8.28   |
| <i>N</i> -nornuciferine           | 314.20 $\pm$ 6.79   | 1949.00 $\pm$ 13.72 | 4555.33 $\pm$ 26.40  | 3356.67 $\pm$ 32.53 | 1091.07 $\pm$ 9.90  |
| coclaurine                        | 59.33 $\pm$ 8.07    | 369.67 $\pm$ 9.90   | 978.27 $\pm$ 8.34    | 673.67 $\pm$ 11.03  | 120.64 $\pm$ 6.72   |
| <i>N</i> -methycoclaurine         | 233.53 $\pm$ 4.61   | 2034.13 $\pm$ 2.83  | 1718.53 $\pm$ 5.75   | 1348.00 $\pm$ 4.38  | 1704.20 $\pm$ 7.50  |
| nuciferine                        | 352.20 $\pm$ 12.16  | 2097.33 $\pm$ 31.11 | 2118.67 $\pm$ 14.14  | 2534.67 $\pm$ 20.27 | 969.33 $\pm$ 4.90   |
| asimilobine                       | 84.00 $\pm$ 6.53    | 147.59 $\pm$ 1.64   | 373.80 $\pm$ 2.55    | 1108.80 $\pm$ 11.31 | 588.93 $\pm$ 8.91   |
| isoliensinine                     | 26.86 $\pm$ 3.14    | 22.53 $\pm$ 1.99    | 109.59 $\pm$ 7.25    | 186.39 $\pm$ 4.78   | 112.26 $\pm$ 4.38   |
| neferine                          | 4.54 $\pm$ 0.14     | 2.35 $\pm$ 0.42     | 16.75 $\pm$ 1.46     | 15.49 $\pm$ 2.55    | 9.77 $\pm$ 0.07     |
| cis- <i>N</i> -feruloyltyramine   | -                   | 42.82 $\pm$ 1.10    | 7.06 $\pm$ 0.01      | -                   | -                   |
| trans- <i>N</i> -feruloyltyramine | 40.55 $\pm$ 1.62    | 52.30 $\pm$ 3.25    | 97.27 $\pm$ 6.13     | 478.40 $\pm$ 7.35   | 19.25 $\pm$ 2.80    |
| Total alkaloids                   | 2236.81 $\pm$ 48.86 | 7190.59 $\pm$ 68.93 | 10277.54 $\pm$ 73.73 | 10145.89 $\pm$ 98.0 | 4956.52 $\pm$ 53.46 |
